# Supplementary material for: Decorin induced by progesterone plays a crucial role in suppressing endometriosis
Source: PubMed Central journal article supplement (PMC4198121; doi:10.1530/joe-14-0393), 2014-11

Supplemental data 1

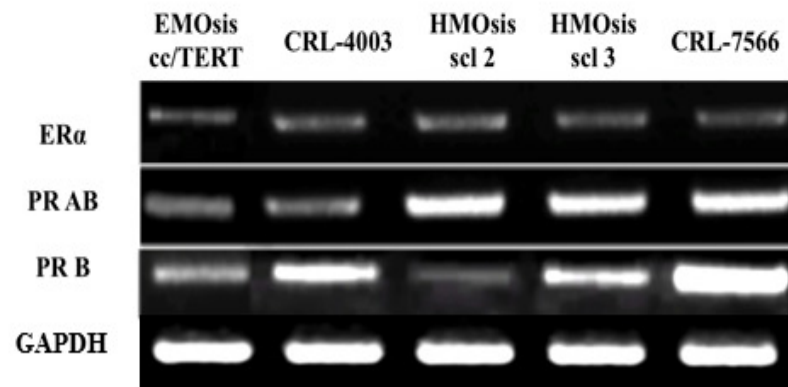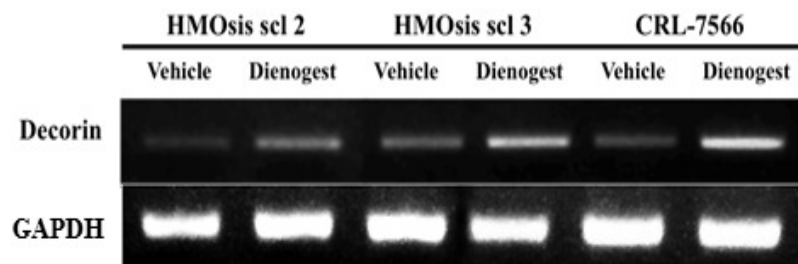

Supplement: supp_JOE-14-0393_Supplementary_figure_1.pdf [file supp_JOE-14-0393_Supplementary_figure_1.pdf]
